# Supplementary material
Source: PubMed Central journal article supplement (PMC1502500)

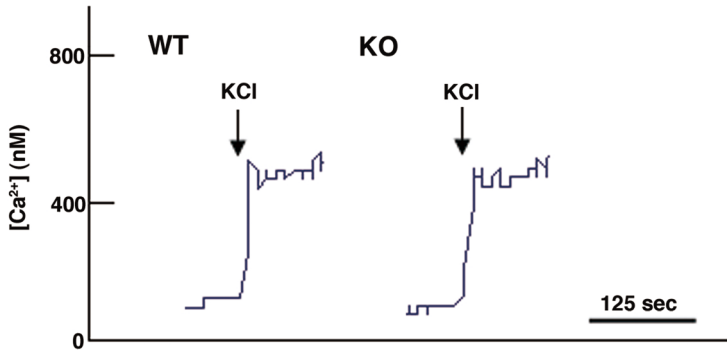

Supplement: pnas_0600304103_1.pdf [file pnas_0600304103_1.pdf]

WT

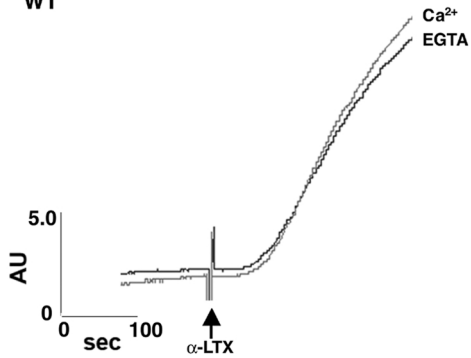

KO

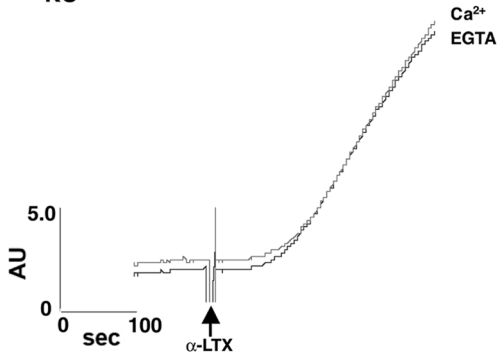

Supplement: pnas_0600304103_2.pdf [file pnas_0600304103_2.pdf]

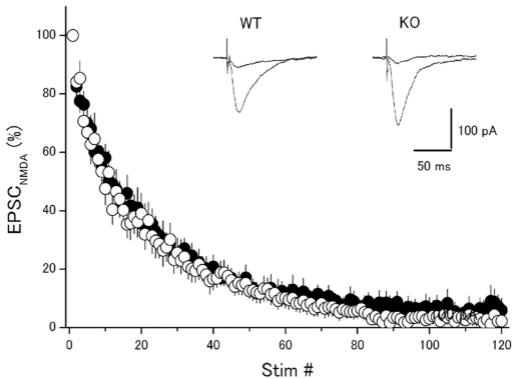

Supplement: pnas_0600304103_3.pdf [file pnas_0600304103_3.pdf]
